# Supplementary material for: Final Exon Frameshift Biallelic PTPN23 Variants Are Associated with Microcephalic Complex Hereditary Spastic Paraplegia
Source: MDPI journal article supplement (doi:10.3390/brainsci11050614), 2021-05-11
Supplement: s1 [file s1]

# Final exon frameshift biallelic *PTPN23* variants are associated with microcephalic complex hereditary spastic paraplegia.

## Supplemental Paper

Reham Khalaf-Nazzal<sup>1,\*,</sup>, James Fasham<sup>2,3#</sup>, Nishanka Ubeyratna<sup>2</sup>, David Evans<sup>4</sup>, Joseph S Leslie<sup>2</sup>, Thomas T Warner<sup>5</sup>, Fida' Al-Hijawi<sup>6</sup>, Shurouq Alshaer<sup>7</sup>, Wisam Baker<sup>8</sup>, Peter D Turnpenny<sup>2,3</sup>, Emma L Baple<sup>2,3,\*,</sup>, Andrew H Crosby<sup>2,3,\*,</sup>

- <sup>1</sup> Biomedical Sciences Department, Faculty of Medicine, Arab American University of Palestine, Jenin, Palestine; [reham.nazzal@aaup.edu](mailto:reham.nazzal@aaup.edu)
  - <sup>2</sup> College of Medicine and Health, RILD Wellcome Wolfson Centre, University of Exeter, Royal Devon & Exeter NHS Foundation Trust, Barrack Road, Exeter, EX2 5DW, UK; [j.fasham@exeter.ac.uk](mailto:j.fasham@exeter.ac.uk); [nu213@exeter.ac.uk](mailto:nu213@exeter.ac.uk); [j.leslie@exeter.ac.uk](mailto:j.leslie@exeter.ac.uk); [e.baple@exeter.ac.uk](mailto:e.baple@exeter.ac.uk); [a.h.crosby@exeter.ac.uk](mailto:a.h.crosby@exeter.ac.uk)
  - <sup>3</sup> Peninsula Clinical Genetics Service, Royal Devon & Exeter Hospital (Heavitree), Gladstone Road, Exeter, EX1 2ED, UK; [J.Fasham@exeter.ac.uk](mailto:J.Fasham@exeter.ac.uk); [e.baple@exeter.ac.uk](mailto:e.baple@exeter.ac.uk); [peter.turnpenny@nhs.net](mailto:peter.turnpenny@nhs.net)
  - <sup>4</sup> Exeter Genomics Laboratory, Royal Devon & Exeter NHS Foundation Trust, Exeter, UK; [david.evans34@nhs.net](mailto:david.evans34@nhs.net)
  - <sup>5</sup> Reta Lila Weston Institute, UCL Queen Square Institute of Neurology, 1 Wakefield Street, London WC1N 1PJ; [t.warner@ucl.ac.uk](mailto:t.warner@ucl.ac.uk)
  - <sup>6</sup> Paediatrics' Community Outpatient Clinics, Palestinian Ministry of Health. Jenin, Palestine; [Hajfida7@gmail.com](mailto:Hajfida7@gmail.com)
  - <sup>7</sup> Faculty of Graduate Studies, Arab American University. Ramallah, Palestine; [shoroqalshaer362@gmail.com](mailto:shoroqalshaer362@gmail.com)
  - <sup>8</sup> Paediatrics Department, Dr. Khalil Suleiman Government hospital. Jenin, Palestine, [wisambaker30@yahoo.com](mailto:wisambaker30@yahoo.com)
- # These authors contributed equally to this work  
\$ These authors contributed equally to this work  
\* Correspondence: [a.h.crosby@exeter.ac.uk](mailto:a.h.crosby@exeter.ac.uk); [e.baple@exeter.ac.uk](mailto:e.baple@exeter.ac.uk); [reham.nazzal@aaup.edu](mailto:reham.nazzal@aaup.edu)

**Citation:** Nazzal, R.; Fasham, J. *et al.* F. Final exon frameshift biallelic *PTPN23* variants are associated with microcephalic complex hereditary spastic paraplegia. *Brain Sci.* **2021**, *11*, x. <https://doi.org/10.3390/xxxxx>

Academic Editor: Firstname Last-name

Received: date

Accepted: date

Published: date

**Publisher's Note:** MDPI stays neutral with regard to jurisdictional claims in published maps and institutional affiliations.

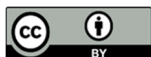

**Copyright:** © 2021 by the authors. Submitted for possible open access publication under the terms and conditions of the Creative Commons Attribution (CC BY) license (<https://creativecommons.org/licenses/by/4.0/>).

**Table S1. Candidate *PTPN23* gene variants identified in patients with severe neurological impairment and seizures.**

| Reference                   | Alazami[1]                                                                                                                                    | Trujillano[2]                                                   | Sowada[3]                                                                                                          | Smigiel[4]                                                                                                                        | Bend[5]<br>Patient 4                                                            |
|-----------------------------|-----------------------------------------------------------------------------------------------------------------------------------------------|-----------------------------------------------------------------|--------------------------------------------------------------------------------------------------------------------|-----------------------------------------------------------------------------------------------------------------------------------|---------------------------------------------------------------------------------|
| Genotype<br>(NM_015466.4)   | Homozygous<br>c.3995G>T: p.(Arg1332Leu)                                                                                                       | Homozygous<br>c.904A>G p.(Met302Val)                            | c.1595C>T p.(Pro532Leu)<br>  c.3586C>T p.(Arg1196*)                                                                | c.1902C>G p.(Asn634Lys)<br>  c.2974delC;<br>p.(Leu992Tyrfs*168)                                                                   | Homozygous<br>c.2568_2594del27;<br>p.(Val857_Pro865del)                         |
| Family history              | Parents are cousins<br>Two similar deceased siblings                                                                                          | NK                                                              | Isolated case                                                                                                      | Isolated case                                                                                                                     |                                                                                 |
| Ethnicity                   | Saudi Arabian                                                                                                                                 | NK                                                              | Northern European                                                                                                  | Northern European                                                                                                                 | Syrian                                                                          |
| Sex                         | M                                                                                                                                             | NK                                                              | F                                                                                                                  | F                                                                                                                                 | F                                                                               |
| Age                         | 5y                                                                                                                                            | NK                                                              | Died 4y10                                                                                                          | 4y                                                                                                                                | 7y                                                                              |
| OFC (cm) [SD]               | NK                                                                                                                                            | Microcephaly                                                    | Primary microcephaly                                                                                               | 46 cm (3 cm<br>below 3rd percentile)<br>Primary microcephaly                                                                      | 47cm                                                                            |
| <b>Development</b>          |                                                                                                                                               |                                                                 |                                                                                                                    |                                                                                                                                   |                                                                                 |
| Developmental<br>impairment | ✓ - global developmental delay                                                                                                                | ✓ - global developmental delay<br>with developmental regression | ✓ - profound, no cognitive and<br>motor development                                                                | ✓ - profound                                                                                                                      | ✓ - profound, no<br>milestones                                                  |
| <b>Neurology</b>            |                                                                                                                                               |                                                                 |                                                                                                                    |                                                                                                                                   |                                                                                 |
| Findings                    | “Cerebral palsy”                                                                                                                              | Spasticity<br>abnormality of movement                           | progressive<br>spasticity                                                                                          | severe spasticity of all four<br>limbs                                                                                            | Spasticity and contractures;<br>wheelchair bound,<br>little purposeful movement |
| <b>Neurology - other</b>    |                                                                                                                                               |                                                                 |                                                                                                                    |                                                                                                                                   |                                                                                 |
| Seizures                    | ✓                                                                                                                                             | ✓                                                               | ✓ - from 5m, infantile spasms<br>then polymorphic and treat-<br>ment resistant                                     | ✓ - from 2y electroencephalog-<br>raphy<br>showed multifocal discharges                                                           | (✓) Febrile                                                                     |
| Optic atrophy               |                                                                                                                                               | NK                                                              | ✓                                                                                                                  | ✓ and abnormal visual evoked<br>potentials (VEP).                                                                                 | Significant visual<br>impairment                                                |
| <b>Neuroimaging</b>         |                                                                                                                                               |                                                                 |                                                                                                                    |                                                                                                                                   |                                                                                 |
| <i>MRI brain</i>            | Severe white matter volume<br>loss with enlarged ventricles<br><br>Mild cerebellar atrophy<br>Thin corpus callosum<br>Cystic encephalomalacia | brain atrophy                                                   | Severe white matter volume<br>loss with enlarged ventricles,<br>Absent myelination,<br>Hypoplastic corpus callosum | Severe white matter volume<br>loss with enlarged ventricles,<br>Absent myelination,<br>Cerebellar atrophy<br>Thin corpus callosum | (reported by parents)<br>Brain atrophy and lissencephaly                        |
| <b>Other</b>                |                                                                                                                                               |                                                                 |                                                                                                                    |                                                                                                                                   |                                                                                 |
|                             | Gastroesophageal reflux dis-<br>ease                                                                                                          |                                                                 |                                                                                                                    |                                                                                                                                   |                                                                                 |

**Table S2. Candidate *PTPN23* gene variants, proposed by Bend *et al.* 2020 [5].**

|           | GRCH38 nomenclature<br>NM_015466.4:                                                                   | gnomAD v2.1.1<br>non-neuro (AF) | gnomAD v3.1<br>non-neuro (AF) | SiFT      | Polyphen2<br>HumVar  | Rationale for<br>exclusion                                               |
|-----------|-------------------------------------------------------------------------------------------------------|---------------------------------|-------------------------------|-----------|----------------------|--------------------------------------------------------------------------|
| Patient 1 | Chr3:g.47410478C>T<br>c.2680C>T p.(His894Tyr)                                                         | 1 het<br>(<0.01%)               | 4 het<br>(<0.01%)             | Tolerated | Benign               | -                                                                        |
|           | Chr3:g.47410545A>G<br>c.2747A>G p.(Gln916Arg)                                                         | 7 het<br>(0.003%)               | 4 het<br>(<0.01%)             | Tolerated | Benign               |                                                                          |
| Patient 2 | Chr3:g.47411546G>A<br>c.3748G>A p.(Glu1250Lys)                                                        | 20 het<br>(<0.01%)              | 18 het<br>(0.01%)             | Tolerated | Possibly<br>damaging | -                                                                        |
|           | Chr3:g.47410663<br>CCAGCCCCATCCT>C<br>c.2878_2889del12;<br>p.(Gln960_Pro963del)                       | 321 het<br>(0.14%)              | 260 het<br>(0.2%)             | -         | -                    | Poor amino<br>acid conserva-<br>tion / repeti-<br>tive region (a)        |
| Patient 3 | Chr3:g.47408451C>T<br>c.1291C>T p.(Arg431Trp)                                                         | 36 het<br>(0.01%)               | 25 het (0.01%)                | Damaging  | Possibly<br>damaging | -                                                                        |
|           | Chr3:g.47410284C>T<br>c.2486 C > T p.(Pro829Leu)                                                      | 2 het<br>(<0.01%)               | 3 het<br>(<0.01%)             | Damaging  | Benign               | -                                                                        |
| Patient 4 | Chr3:g.47410366 AGTT-<br>GCAGGTCTCC<br>CCTCGGCCCCACC > -<br>c.2568_2594del27;<br>p.(Val857_Pro865del) | Absent <sup>b</sup>             | Absent                        | -         | -                    | -                                                                        |
| Patient 5 | Chr3:g.47411681GAGA>G<br>c.3884_3886delAGA;<br>p.(1295_1296delLys)                                    | 113 het<br>(0.05%)              | 50 het<br>(0.03%)             | -         | -                    | Ashkenazi<br>Jewish gno-<br>mAD v2.1.1<br>frequency<br>1.4% <sup>c</sup> |
| Patient 6 | Chr3:g.47412926C>CCC<br>c.4651_4652dup;<br>p.(Leu1552Hisfs*33)                                        | Absent                          | Absent                        | -         | -                    | -                                                                        |
| Patient 7 | Chr3:g.47409268A>G<br>c.1748A>G p.(Lys583Arg)<br><i>in cis</i>                                        | 20 het<br>(<0.01%)              | 50 het<br>(0.03%)             | Damaging  | Possibly<br>damaging | <i>in cis with</i><br><b>Gln1017His</b>                                  |
|           | Chr3:g.47410849G>C<br>c.3051G>C p.(Gln1017His)<br><i>in cis</i>                                       | 59 het (0.03%)                  | 49 het<br>(0.04%)             | Tolerated | Benign               | <i>in cis with</i><br><b>Lys583Arg</b>                                   |
|           | Chr3:g.47406548G>A<br>c.695 G > A p.(Arg232Gln)<br><i>in trans</i>                                    | 10 het<br>(<0.01%)              | 14 het<br>1 hom<br>(0.01%)    | Damaging  | Benign               | <b>Homozygous<br/>individual in<br/>gnomAD 3.1.1</b>                     |

Abbreviations: AF, allele frequency; het, heterozygous individual; hom, homozygous individual

(a) Note that this deletion can also be annotated as c.2866\_2877del12 p.(Gln956\_Pro959del) as it actually is a deletion of a once-repeated 12 nucleotide sequence (repeat QPHP), thus making the position of the change potentially ambiguous to mapping software. This region of the protein is poorly conserved (Fig S4) and although we can not conclude that the variant is benign we would consider it a variant of uncertain significance with limited evidence supporting causality.

(b) An alternative allele also resulting in the same p.Val857\_Pro865del is present in one individual in gnomAD v2.1.1

(c) Assuming Mendelian ratios then it is expected that 1 in every 20,408 Ashkenazi Jewish individuals would be homozygous, suggesting the existence of about 600 such people

**Table S3. Candidate *PTPN23* gene variants identified in patients with non-specific developmental impairment by Bend *et al.* 2020 [5] not excluded by allele frequency data in population databases**

| Reference                 | Patient 1[5]                                                             | Patient 2[5]                                                            | Patient 3[5]                                                        |
|---------------------------|--------------------------------------------------------------------------|-------------------------------------------------------------------------|---------------------------------------------------------------------|
| Genotype<br>(NM_015466.4) | c.2680C>T p.(His894Tyr)<br>  c.2747A>G p.(Gln916Arg)                     | c.3748G>A p.(Glu1250Lys)<br>  c.2878_2889del12;<br>p.(Gln960_Pro963del) | c.1291C>T; p.(Arg431Trp)<br>  c.2486C>T; p.(Pro829Leu)              |
| Family history            |                                                                          |                                                                         |                                                                     |
| Ethnicity                 | Kuwaiti                                                                  | European                                                                | North American                                                      |
| Sex                       | M                                                                        | M                                                                       | M                                                                   |
| Age                       | 14m                                                                      | 3y                                                                      | 6y                                                                  |
| OFC (cm) [SD]             | normal                                                                   | normal                                                                  | normal                                                              |
| <b>Development</b>        |                                                                          |                                                                         |                                                                     |
| Developmental impairment  | ✓ “Gross and fine motor skills at 12.5m corrected age were at 9m”        | ✓ “late to walk independently (~18 months)”                             | ✓                                                                   |
| <b>Neurology</b>          |                                                                          |                                                                         |                                                                     |
| Findings                  | nil                                                                      | bilateral intention tremor and shuffling gait                           | Apraxia                                                             |
| <b>Neurology - other</b>  |                                                                          |                                                                         |                                                                     |
| Seizures                  | ✗                                                                        | ✗ but abnormal EEG                                                      | ✗                                                                   |
| Optic atrophy             | anomalous looking optic disc                                             | NA                                                                      | ✗                                                                   |
| <b>Neuroimaging</b>       |                                                                          |                                                                         |                                                                     |
| <i>MRI brain</i>          | Ventriculomegaly with mild decrease in cerebral volume                   | Ventriculomegaly suspicious for brain volume loss                       | unremarkable                                                        |
| <b>Other</b>              |                                                                          |                                                                         |                                                                     |
|                           | Dysmorphic features, tracheo-oesophageal fistula, mild left pelviectasis | Dysmorphic features, Hypopigmented 4cm patch                            | VSD/PDA, autism, dyspraxia, hyperlexia, Sensory processing disorder |

**Supplementary Figure S4. Position of previously published *PTPN23* candidate missense variants and small in-frame deletions in relation to known *PTPN23* protein domain architecture.**

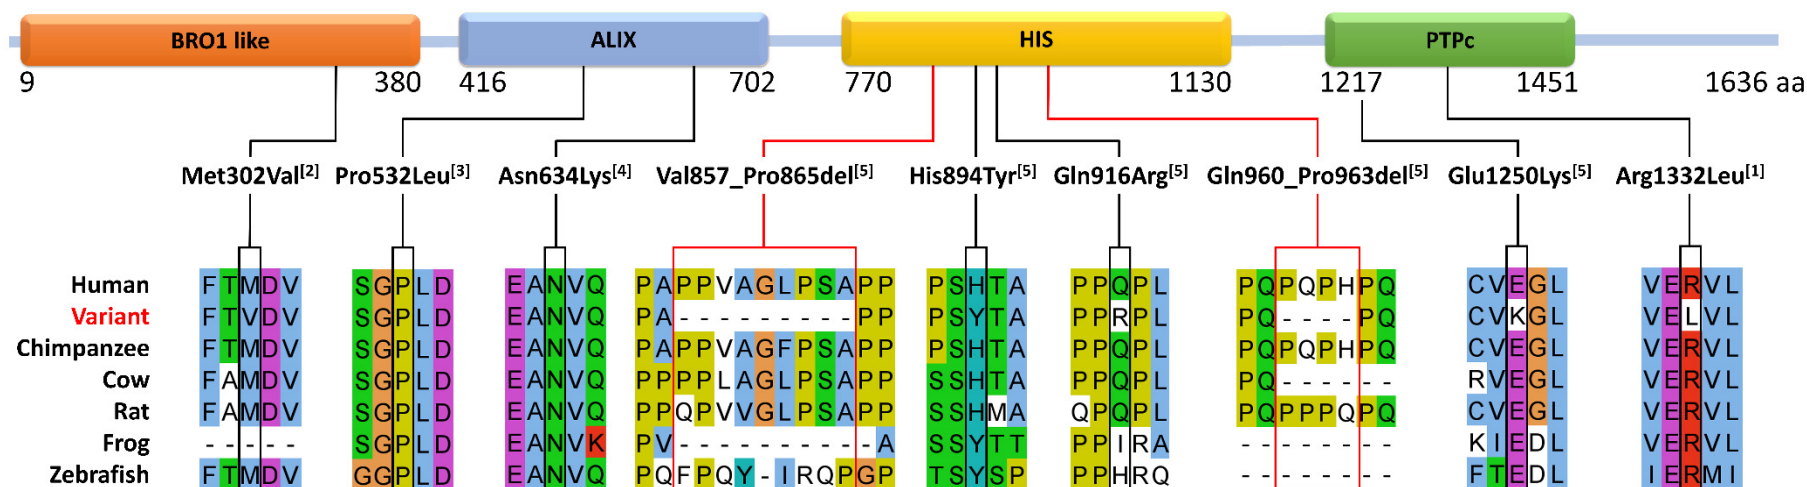

## References for Supplemental paper

1. Alazami AM, Patel N, Shamseldin HE, Anazi S, Al-Dosari MS, Alzahrani F, et al. Accelerating novel candidate gene discovery in neurogenetic disorders via whole-exome sequencing of prescreened multiplex consanguineous families. *Cell Rep.* 2015;10(2):148-61. Epub 2015/01/06. doi: 10.1016/j.celrep.2014.12.015. PubMed PMID: 25558065.
2. Trujillano D, Bertoli-Avella AM, Kumar Kandaswamy K, Weiss ME, Köster J, Marais A, et al. Clinical exome sequencing: results from 2819 samples reflecting 1000 families. *Eur J Hum Genet.* 2017;25(2):176-82. Epub 2016/11/17. doi: 10.1038/ejhg.2016.146. PubMed PMID: 27848944; PubMed Central PMCID: PMC5255946 employed at Centogene AG; AR has financial holdings in Centogene AG; WE, MTAR, AAR, WAT, AAlO, MAB, and MA are employees at King Abdulaziz Medical city; AAlh is employee at Prince Sultan Military Medical City; NAS is employee at Johns Hopkins Aramco hospital.
3. Sowada N, Hashem MO, Yilmaz R, Hamad M, Kakar N, Thiele H, et al. Mutations of PTPN23 in developmental and epileptic encephalopathy. *Hum Genet.* 2017;136(11-12):1455-61. Epub 2017/11/02. doi: 10.1007/s00439-017-1850-3. PubMed PMID: 29090338.
4. Smigiel R, Landsberg G, Schilling M, Rydzanicz M, Pollak A, Walczak A, et al. Developmental epileptic encephalopathy with hypomyelination and brain atrophy associated with PTPN23 variants affecting the assembly of UsnRNPs. *European Journal of Human Genetics.* 2018;26(10):1502-11. doi: 10.1038/s41431-018-0179-2.
5. Bend R, Cohen L, Carter MT, Lyons MJ, Niyazov D, Mikati MA, et al. Phenotype and mutation expansion of the PTPN23 associated disorder characterized by neurodevelopmental delay and structural brain abnormalities. *European Journal of Human Genetics.* 2020;28(1):76-87. doi: 10.1038/s41431-019-0487-1.
